# Supplementary material for: The Location of the Pseudoautosomal Boundary in Silene latifolia
Source: MDPI journal article supplement (doi:10.3390/genes11060610), 2020-05-31
Supplement: s1 [file s1]

**Table S1.** Genotype of wild females at SNPs inheritd from father to sons in the df108 family  
Y-alleles in females are highlighted with green background

| gene name   | SNP pos | Y-allele | X-allele | genotype in females |        |         |          |        |
|-------------|---------|----------|----------|---------------------|--------|---------|----------|--------|
|             |         |          |          | fSa526b             | fSa615 | fSa758d | fSa833d. | fSa985 |
| Contig697   | 1131    | T        | C        | C/C                 | C/C    | C/C     | C/C      | C/C    |
| Contig697   | 1257    | A        | G        | G/G                 | G/G    | G/G     | G/G      | G/G    |
| Contig697   | 1268    | T        | C        | C/C                 | C/C    | C/C     | C/C      | C/C    |
| Contig697   | 1269    | G        | A        | A/A                 | A/A    | A/A     | A/A      | A/A    |
| Contig697   | 1797    | C        | T        | T/T                 | T/T    | T/T     | T/T      | T/T    |
| Contig15301 | 240     | A        | G        | G/G                 | G/G    | G/G     | G/G      | G/G    |
| Contig12513 | 459     | C        | T        | T/T                 | T/T    | T/T     | T/T      | T/T    |
| Contig12513 | 489     | T        | G        | G/G                 | G/G    | G/G     | G/G      | G/G    |
| Contig12513 | 492     | T        | C        | C/C                 | C/C    | C/C     | C/C      | C/C    |
| Contig14349 | 318     | C        | T        | T/T                 | T/T    | T/T     | T/T      | T/T    |
| Contig14349 | 319     | A        | C        | C/C                 | C/C    | C/C     | C/C      | C/C    |
| Contig14349 | 334     | A        | G        | G/G                 | G/G    | G/G     | G/G      | G/G    |
| Contig14349 | 337     | G        | T        | T/T                 | T/T    | T/T     | T/T      | T/T    |
| Contig14349 | 349     | C        | T        | T/T                 | T/T    | T/T     | T/T      | T/T    |
| Contig14349 | 351     | T        | A        | A/A                 | A/A    | A/A     | A/A      | A/A    |
| Contig14349 | 445     | C        | T        | T/T                 | T/T    | T/T     | T/T      | T/T    |
| Contig14349 | 1009    | C        | T        | T/T                 | T/T    | T/T     | T/T      | T/T    |
| Contig14349 | 1023    | C        | A        | A/A                 | A/A    | A/A     | A/A      | A/A    |
| Contig14349 | 1126    | T        | G        | G/G                 | G/G    | G/G     | G/G      | G/G    |
| Contig14349 | 1142    | T        | G        | G/G                 | G/G    | G/G     | G/G      | G/G    |
| Contig14349 | 1150    | A        | G        | G/G                 | G/G    | G/G     | G/G      | G/G    |
| Contig14349 | 1169    | C        | A        | A/A                 | A/A    | A/A     | A/A      | A/A    |
| Contig14349 | 1225    | A        | G        | G/G                 | G/G    | G/G     | G/G      | G/G    |
| Contig14349 | 1264    | T        | G        | G/G                 | G/G    | G/G     | G/G      | G/G    |
| Contig14349 | 1271    | G        | A        | A/A                 | A/A    | A/A     | A/A      | A/A    |
| Contig14349 | 1301    | T        | C        | C/C                 | C/C    | C/C     | C/C      | C/C    |
| Contig17773 | 203     | T        | C        | C/C                 | C/C    | C/C     | C/C      | C/C    |
| Contig17773 | 251     | A        | G        | G/G                 | G/G    | G/G     | G/G      | G/G    |
| Contig17773 | 350     | G        | C        | C/C                 | C/C    | C/C     | C/C      | C/C    |
| Contig17773 | 398     | G        | A        | A/A                 | A/A    | A/A     | A/A      | A/A    |
| Contig17773 | 424     | C        | G        | G/G                 | G/G    | G/G     | G/G      | G/G    |
| Contig17773 | 435     | T        | C        | C/C                 | C/C    | C/C     | C/C      | C/C    |
| Contig17773 | 446     | T        | C        | C/C                 | C/C    | C/C     | C/C      | C/C    |
| Contig17773 | 485     | G        | A        | A/A                 | A/A    | A/A     | A/A      | A/A    |
| Contig17773 | 524     | T        | C        | C/C                 | C/C    | C/C     | C/C      | C/C    |
| Contig17773 | 553     | G        | C        | C/C                 | C/C    | C/C     | C/C      | C/C    |
| Contig17773 | 569     | T        | G        | G/G                 | G/G    | G/G     | G/G      | G/G    |
| Contig17773 | 582     | A        | G        | G/G                 | G/G    | G/G     | G/G      | G/G    |

|             |      |   |   |     |     |     |     |     |
|-------------|------|---|---|-----|-----|-----|-----|-----|
| Contig17773 | 620  | G | T | T/T | T/T | T/T | T/T | T/T |
| Contig17773 | 689  | G | A | A/A | A/A | A/A | A/A | A/A |
| Contig17773 | 761  | T | A | A/A | A/A | A/A | A/A | A/A |
| Contig17773 | 854  | A | T | T/T | T/T | T/T | T/T | T/T |
| Contig17773 | 923  | C | T | T/T | T/T | T/T | T/T | T/T |
| Contig17773 | 1046 | A | T | T/T | T/T | T/T | T/T | T/T |
| Contig17773 | 1102 | G | A | A/A | A/A | A/A | A/A | A/A |
| Contig17773 | 1163 | T | C | C/C | C/C | C/C | C/C | C/C |
| Contig17773 | 1169 | A | G | G/G | G/G | G/G | G/G | G/G |
| Contig17773 | 1211 | T | C | C/C | C/C | C/C | C/C | C/C |
| Contig17773 | 1257 | T | C | C/C | C/C | C/C | C/C | C/C |
| Contig17773 | 1261 | T | C | C/C | C/C | C/C | C/C | C/C |
| Contig17773 | 1274 | T | G | G/G | G/G | G/G | G/G | G/G |
| Contig17773 | 1336 | T | A | A/A | A/A | A/A | A/A | A/A |
| Contig17773 | 1356 | C | A | A/A | A/A | A/A | A/A | A/A |
| Contig8598  | 362  | C | T | T/T | T/T | T/T | T/T | T/T |
| Contig8598  | 370  | A | C | C/C | C/C | C/C | C/C | C/C |
| Contig8598  | 374  | T | C | C/C | C/C | C/C | C/C | C/C |
| Contig8598  | 375  | T | C | C/C | C/C | C/C | C/C | C/C |
| Contig8598  | 380  | G | A | A/A | A/A | A/A | A/A | A/A |
| Contig8598  | 410  | C | T | T/T | T/T | T/T | T/T | T/T |
| Contig8598  | 413  | A | C | C/C | C/C | C/C | C/C | C/C |
| Contig8598  | 425  | G | A | A/A | A/A | A/A | A/A | A/A |
| Contig8598  | 426  | T | C | C/C | C/C | C/C | C/C | C/C |
| Contig8598  | 716  | T | C | C/C | C/C | C/C | C/C | C/C |
| Contig8598  | 1079 | C | T | T/T | T/T | T/T | T/T | T/T |
| Contig1798  | 1444 | T | C | C/C | C/C | C/C | C/C | C/C |
| Contig1798  | 1450 | T | C | C/C | C/C | C/C | C/C | C/C |
| Contig1798  | 1461 | A | G | G/G | G/G | G/G | G/G | G/G |
| Contig1798  | 1465 | C | A | A/A | A/A | C/A | A/A | A/A |
| Contig9505  | 47   | A | G | G/G | G/G | G/G | G/G | G/G |
| Contig9505  | 79   | T | C | T/C | T/C | T/C | C/C | C/C |
| Contig9505  | 93   | T | C | C/C | C/C | C/C | C/C | C/C |
| Contig9505  | 154  | T | G | G/G | G/G | G/G | G/G | G/G |
| Contig9505  | 231  | T | A | A/A | A/A | A/A | A/A | A/A |
| Contig9505  | 632  | A | G | G/G | G/G | G/G | G/G | G/G |
| Contig9505  | 696  | G | A | A/A | A/A | A/A | A/A | A/A |
| Contig9505  | 777  | T | G | G/G | G/G | G/G | G/G | G/G |
| Contig9505  | 1030 | G | A | A/A | A/A | A/A | A/A | A/A |
| Contig9505  | 1035 | T | A | A/A | A/A | A/A | A/A | A/A |
| Contig9505  | 1098 | C | T | T/T | T/T | T/T | T/T | T/T |
| Contig9505  | 1121 | T | A | A/A | A/A | A/A | A/A | A/A |

|             |      |   |   |     |     |     |     |     |
|-------------|------|---|---|-----|-----|-----|-----|-----|
| Contig9505  | 1284 | A | G | G/G | G/G | G/G | G/G | G/G |
| Contig9505  | 1481 | T | C | C/C | C/C | C/C | C/C | C/C |
| Contig18786 | 648  | T | C | C/C | C/C | C/C | C/C | C/C |
| Contig18786 | 649  | T | C | C/C | C/C | C/C | C/C | C/C |
| Contig2117  | 965  | C | T | T/T | T/T | T/T | T/T | T/T |
| Contig1046  | 76   | G | T | T/T | T/T | T/T | T/T | T/T |
| Contig1046  | 134  | T | G | G/G | G/G | G/G | G/G | G/G |
| Contig1046  | 137  | G | C | C/C | C/C | C/C | C/C | C/C |
| Contig1046  | 227  | T | G | G/G | T/G | T/G | G/G | G/G |
| Contig1046  | 439  | G | A | A/A | G/A | A/A | A/A | A/A |
| Contig1046  | 451  | A | G | A/G | A/G | G/G | G/G | G/G |
| Contig1046  | 510  | G | A | G/A | G/A | A/A | A/A | A/A |
| Contig1046  | 760  | C | T | T/T | T/T | T/T | T/T | T/T |
| Contig1046  | 770  | G | T | T/T | T/T | T/T | T/T | T/T |
| Contig1046  | 910  | A | G | G/G | G/G | G/G | G/G | G/G |
| Contig1046  | 1239 | T | C | C/C | C/C | C/C | C/C | C/C |
| Contig1046  | 1579 | G | C | C/C | C/C | C/C | C/C | C/C |
| Contig1046  | 1591 | G | T | T/T | T/T | T/T | T/T | T/T |
| Contig1251  | 137  | T | A | T/A | T/A | T/A | A/A | A/A |
| Contig1251  | 180  | A | G | G/G | G/G | G/G | G/G | G/G |
| Contig1251  | 340  | A | C | C/C | C/C | C/C | C/C | C/C |
| Contig1251  | 777  | A | T | T/T | T/T | T/T | T/T | T/T |
| Contig1251  | 814  | A | G | G/G | G/G | G/G | G/G | G/G |
| Contig1251  | 969  | G | C | C/C | C/C | G/C | C/C | C/C |
| Contig1251  | 1189 | A | G | G/G | G/G | G/G | G/G | G/G |
| Contig1251  | 1192 | G | A | A/A | A/A | A/A | A/A | A/A |
| Contig1251  | 1222 | G | A | A/A | A/A | A/A | A/A | A/A |
| Contig1251  | 1298 | G | T | T/T | T/T | T/T | T/T | T/T |
| Contig1251  | 1384 | C | T | T/T | T/T | T/T | T/T | T/T |
| Contig1251  | 1408 | A | G | G/G | G/G | G/G | G/G | G/G |
| Contig1251  | 1411 | G | T | T/T | T/T | T/T | T/T | T/T |
| Contig1251  | 1447 | G | A | A/A | A/A | A/A | A/A | A/A |
| Contig1251  | 1507 | C | T | C/T | C/T | T/T | T/T | T/T |
| Contig1251  | 1517 | A | G | G/G | G/G | G/G | G/G | G/G |
| Contig1251  | 1540 | A | G | A/G | G/G | G/G | G/G | G/G |
| Contig1251  | 1588 | A | G | G/G | G/G | G/G | G/G | G/G |
| Contig1251  | 1663 | A | C | C/C | C/C | C/C | C/C | C/C |
| Contig1251  | 1669 | G | A | A/A | A/A | A/A | A/A | A/A |
| Contig1251  | 1672 | G | A | A/A | A/A | A/A | A/A | A/A |
| Contig1251  | 1675 | G | A | A/A | A/A | A/A | A/A | A/A |
| Contig1251  | 1797 | A | G | G/G | G/G | G/G | G/G | G/G |
| Contig1251  | 1814 | T | A | A/A | A/A | A/A | A/A | A/A |

|             |      |   |   |     |     |     |     |     |
|-------------|------|---|---|-----|-----|-----|-----|-----|
| Contig13504 | 243  | A | G | G/G | G/G | G/G | G/G | G/G |
| Contig13504 | 426  | A | G | G/G | G/G | G/G | G/G | G/G |
| Contig13504 | 469  | T | C | C/C | C/C | C/C | C/C | C/C |
| Contig13504 | 516  | A | C | C/C | C/C | C/C | C/C | C/C |
| Contig13504 | 894  | A | G | G/G | G/G | G/G | G/G | G/G |
| Contig1623  | 671  | G | A | A/A | A/A | A/A | A/A | A/A |
| Contig1623  | 674  | G | T | T/T | T/T | T/T | T/T | T/T |
| Contig1623  | 917  | C | A | A/A | A/A | A/A | A/A | A/A |
| Contig528   | 147  | C | T | T/T | T/T | T/T | T/T | T/T |
| Contig528   | 164  | G | C | C/C | C/C | C/C | C/C | C/C |
| Contig528   | 644  | G | T | T/T | T/T | T/T | T/T | T/T |
| Contig528   | 653  | C | T | T/T | T/T | T/T | T/T | T/T |
| Contig528   | 848  | T | G | G/G | G/G | G/G | G/G | G/G |
| Contig528   | 884  | T | C | C/C | C/C | C/C | C/C | C/C |
| Contig528   | 927  | A | G | G/G | G/G | G/G | G/G | G/G |
| Contig528   | 1025 | T | C | C/C | C/C | C/C | C/C | C/C |
| Contig528   | 1052 | T | G | G/G | G/G | G/G | G/G | G/G |
| Contig528   | 1352 | T | C | C/C | C/C | C/C | C/C | C/C |
| Contig528   | 1657 | C | G | G/G | G/G | G/G | G/G | G/G |
| Contig13419 | 63   | T | G | G/G | G/G | G/G | G/G | G/G |
| Contig13419 | 109  | C | G | G/G | C/G | G/G | G/G | G/G |
| Contig13419 | 110  | A | C | C/C | A/C | C/C | C/C | C/C |
| Contig13419 | 159  | A | G | G/G | G/G | G/G | G/G | G/G |
| Contig13419 | 160  | A | C | C/C | C/C | C/C | C/C | C/C |
| Contig13419 | 261  | A | G | G/G | G/G | G/G | G/G | G/G |
| Contig13419 | 278  | C | T | T/T | T/T | T/T | T/T | T/T |
| Contig13419 | 311  | G | C | C/C | C/C | C/C | C/C | C/C |
| Contig13419 | 364  | C | A | A/A | A/A | A/A | A/A | A/A |
| Contig13419 | 396  | C | T | T/T | T/T | C/T | T/T | T/T |
| Contig13419 | 551  | A | G | G/G | G/G | G/G | G/G | G/G |
| Contig13419 | 592  | A | C | C/C | C/C | C/C | C/C | C/C |
| Contig13419 | 1371 | C | T | T/T | T/T | T/T | T/T | T/T |
| Contig13419 | 1374 | T | C | C/C | C/C | C/C | C/C | C/C |
| Contig13419 | 1378 | A | G | G/G | G/G | G/G | G/G | G/G |
| Contig13419 | 1410 | G | A | A/A | A/A | A/A | A/A | A/A |
| Contig13419 | 1594 | T | G | G/G | G/G | G/G | G/G | G/G |
| Contig13419 | 1599 | T | C | C/C | C/C | C/C | C/C | C/C |
| Contig13419 | 1639 | C | T | T/T | T/T | C/T | T/T | T/T |
| Contig13419 | 1651 | G | A | A/A | A/A | A/A | A/A | A/A |
| Contig13419 | 1676 | C | A | A/A | A/A | A/A | A/A | A/A |
| Contig13419 | 1749 | C | T | T/T | T/T | T/T | T/T | T/T |
| Contig13419 | 1763 | T | C | C/C | C/C | C/C | C/C | C/C |

|             |      |   |   |     |     |     |     |     |
|-------------|------|---|---|-----|-----|-----|-----|-----|
| Contig15757 | 283  | A | G | G/G | G/G | G/G | G/G | G/G |
| Contig15757 | 300  | C | T | T/T | T/T | T/T | T/T | T/T |
| Contig15757 | 334  | G | A | A/A | A/A | A/A | A/A | A/A |
| Contig15757 | 366  | C | A | A/A | A/A | A/A | A/A | A/A |
| Contig15757 | 406  | A | T | T/T | T/T | T/T | T/T | T/T |
| Contig15757 | 425  | A | T | T/T | T/T | T/T | T/T | T/T |
| Contig15757 | 537  | G | A | A/A | A/A | A/A | A/A | A/A |
| Contig15757 | 539  | T | C | C/C | C/C | C/C | C/C | C/C |
| Contig15757 | 702  | T | C | C/C | C/C | C/C | C/C | C/C |
| Contig15757 | 705  | G | A | A/A | A/A | A/A | A/A | A/A |
| Contig15757 | 711  | T | G | G/G | G/G | G/G | G/G | G/G |
| Contig15757 | 725  | T | C | C/C | C/C | C/C | C/C | C/C |
| Contig15757 | 732  | C | T | T/T | T/T | T/T | T/T | T/T |
| Contig15519 | 519  | T | G | G/G | G/G | G/G | G/G | G/G |
| Contig15519 | 1132 | T | C | C/C | C/C | C/C | C/C | C/C |
| Contig9011  | 486  | C | T | C/T | C/T | C/T | T/T | T/T |

---
