# Supplementary material for: The Location of the Pseudoautosomal Boundary in Silene latifolia
Source: MDPI journal article supplement (doi:10.3390/genes11060610), 2020-05-31
Supplement: s1 [file s1]

**Table S2.** Location of genes adjacent to PAR-boundary in the *S. latifolia* genomic scaffolds published in ref [47]. The scaffolds containing >1 gene are shown in bold.

| #  | Gene        |         |        | Genomic scaffold |         | %      | Pos. in scaffold |         |
|----|-------------|---------|--------|------------------|---------|--------|------------------|---------|
|    | cDNA        | map pos | PAR?   | name             | length  |        | start            | end     |
| 1  | Contig675   | 62.6    | X      | QBIE01001963.1   | 371,899 | 99.73  | 26,286           | 34,629  |
| 2  | Contig697   | 62.6    | X      | QBIE01030564.1   | 8,309   | 99.27  | 3,502            | 7,879   |
| 3  | Contig804   | 62.6    | X      | QBIE01000326.1   | 49,350  | 100.00 | 15,301           | 26,640  |
| 4  | Contig867   | 62.6    | X      | QBIE01041289.1   | 8,602   | 100.00 | 73               | 7,460   |
| 5  | Contig8509  | 62.6    | X      | QBIE01003146.1   | 25,308  | 99.06  | 7,192            | 24,889  |
| 6  | Contig8598  | 62.6    | X      | QBIE01004030.1   | 68,990  | 98.45  | 10,741           | 19,409  |
| 7  | Contig8660  | 62.6    | X      | QBIE01001396.1   | 44,622  | 99.32  | 44,029           | 44,471  |
| 8  | Contig12513 | 62.6    | X      | QBIE01018774.1   | 13,172  | 100.00 | 6,441            | 10,995  |
| 9  | Contig15301 | 62.6    | X      | QBIE01001029.1   | 89,827  | 99.70  | 38,483           | 38,810  |
| 10 | Contig1564  | 62.6    | X      | QBIE01031006.1   | 10,699  | 98.91  | 217              | 2,802   |
| 11 | Contig1740  | 62.6    | X      | QBIE01001590.1   | 90,538  | 99.85  | 75,360           | 76,034  |
| 12 | Contig17645 | 62.6    | X      | QBIE01000680.1   | 93,542  | 99.80  | 72,262           | 73,770  |
| 13 | Contig18491 | 62.6    | X      | QBIE01144983.1   | 1,447   | 100.00 | 1,176            | 1,447   |
| 14 | Contig1290  | 62.6    | X      | QBIE01011154.1   | 16,893  | 99.64  | 4,608            | 15,121  |
| 15 | Contig14349 | 62.6    | X      | QBIE01002388.1   | 24,242  | 98.71  | 16,380           | 19,502  |
| 16 | Contig1436  | 62.6    | X      | QBIE01011960.1   | 24,831  | 100.00 | 7,258            | 23,580  |
| 17 | Contig15401 | 62.6    | X      | QBIE01013336.1   | 14,174  | 99.77  | 1,555            | 2,872   |
| 18 | Contig17773 | 62.6    | X      | QBIE01010323.1   | 14,859  | 100.00 | 949              | 14,767  |
| 19 | Contig1804  | 62.6    | X      | QBIE01000292.1   | 26,470  | 100.00 | 8,110            | 13,415  |
| 20 | Contig18911 | 62.6    | X      | QBIE01017539.1   | 9,926   | 99.79  | 8,154            | 8,638   |
| 21 | Contig2431  | 62.6    | X      | QBIE01010644.1   | 21,309  | 98.84  | 2,333            | 5,379   |
| 22 | Contig2761  | 62.6    | X      | QBIE01017837.1   | 16,917  | 100.00 | 9,535            | 10,775  |
| 23 | Contig2802  | 62.6    | X      | QBIE01000937.1   | 11,560  | 100.00 | 8,533            | 8,849   |
| 24 | Contig3835  | 62.6    | X      | QBIE01005015.1   | 5,732   | 100.00 | 214              | 1,487   |
| 25 | Contig3846  | 62.6    | X      | QBIE01009689.1   | 18,878  | 100.00 | 5,346            | 8,424   |
| 26 | Contig4210  | 62.6    | X      | QBIE01019453.1   | 22,311  | 100.00 | 681              | 2,170   |
| 27 | Contig4518  | 62.6    | X      | QBIE01015231.1   | 19,373  | 100.00 | 16,481           | 18,191  |
| 28 | Contig5724  | 62.6    | X      | QBIE01004766.1   | 13,815  | 98.28  | 2,108            | 9,654   |
| 29 | Contig8488  | 62.6    | X      | QBIE01004664.1   | 63,618  | 99.84  | 9,888            | 17,210  |
| 30 | Contig1798  | 62.7    | fuzzyB | QBIE01001315.1   | 25,370  | 100.00 | 7,566            | 24,910  |
| 31 | Contig9505  | 62.7    | fuzzyB | QBIE01003253.1   | 2,953   | 99.18  | 86               | 449     |
| 32 | Contig18786 | 62.7    | fuzzyB | QBIE01000061.1   | 129,341 | 99.84  | 115,905          | 116,525 |
| 33 | Contig255   | 62.7    | fuzzyB | QBIE01013388.1   | 15,062  | 99.54  | 7,850            | 10,195  |
| 34 | Contig12476 | 62.8    | fuzzyB | QBIE01000862.1   | 7,785   | 100.00 | 1,812            | 7,760   |
| 35 | Contig2117  | 62.9    | fuzzyB | QBIE01022098.1   | 15,253  | 99.73  | 3,974            | 12,150  |
| 36 | Contig1858  | 62.9    | fuzzyB | QBIE01018657.1   | 7,401   | 100.00 | 4,209            | 4,893   |

|    |             |      |        |                       |         |        |        |        |
|----|-------------|------|--------|-----------------------|---------|--------|--------|--------|
| 37 | Contig456   | 62.9 | fuzzyB | QBIE01000920.1        | 69,497  | 100.00 | 40,188 | 46,000 |
| 38 | Contig1229  | 63   | fuzzyB | QBIE01015569.1        | 17,696  | 100.00 | 3,249  | 14,524 |
| 39 | Contig6406  | 63   | fuzzyB | QBIE01002286.1        | 19,925  | 99.14  | 6,691  | 14,876 |
| 40 | Contig1046  | 63.4 | fuzzyB | QBIE01004665.1        | 17,278  | 98.67  | 11,375 | 13,291 |
| 41 | Contig1251  | 63.4 | fuzzyB | QBIE01012692.1        | 18,013  | 98.36  | 7,978  | 8,832  |
| 42 | Contig13504 | 63.4 | fuzzyB | QBIE01001457.1        | 48,934  | 97.76  | 36,166 | 38,765 |
| 43 | Contig1623  | 63.4 | fuzzyB | QBIE01019676.1        | 3,352   | 98.72  | 2,493  | 3,352  |
| 44 | Contig528   | 63.4 | fuzzyB | QBIE01011343.1        | 7,229   | 98.86  | 6,249  | 6,598  |
| 45 | Contig13419 | 63.6 | fuzzyB | QBIE01001873.1        | 5,748   | 99.79  | 1      | 5,748  |
| 46 | Contig15757 | 63.6 | fuzzyB | QBIE01021457.1        | 9,899   | 100.00 | 7,087  | 7,921  |
| 47 | Contig15519 | 63.6 | fuzzyB | QBIE01011576.1        | 17,344  | 100.00 | 3,289  | 5,712  |
| 48 | Contig9011  | 63.6 | fuzzyB | QBIE01001981.1        | 50,151  | 100.00 | 22     | 2,184  |
| 49 | Contig16617 | 64.8 | PAR    | QBIE01003988.1        | 108,991 | 98.32  | 43,241 | 46,052 |
| 50 | Contig8746  | 65.5 | PAR    | QBIE01000961.1        | 87,498  | 99.28  | 52,055 | 66,298 |
| 51 | Contig634   | 65.5 | PAR    | QBIE01009822.1        | 34,241  | 100.00 | 2,361  | 27,281 |
| 52 | Contig17188 | 65.5 | PAR    | NA                    |         |        |        |        |
| 53 | Contig2083  | 65.7 | PAR    | QBIE01001139.1        | 79,114  | 98.94  | 22,310 | 28,782 |
| 54 | Contig16105 | 65.7 | PAR    | QBIE01005794.1        | 57,368  | 98.60  | 40,736 | 42,360 |
| 55 | Contig4536  | 66.3 | PAR    | NA                    |         |        |        |        |
| 56 | Contig15998 | 66.3 | PAR    | NA                    |         |        |        |        |
| 57 | Contig8522  | 66.6 | PAR    | QBIE01009416.1        | 28,088  | 98.09  | 22,658 | 23,181 |
| 58 | Contig6681  | 66.6 | PAR    | NA                    |         |        |        |        |
| 59 | Contig15667 | 66.7 | PAR    | QBIE01001925.1        | 53,183  | 100.00 | 6,161  | 6,722  |
| 60 | Contig984   | 66.8 | PAR    | QBIE01000425.1        | 64,130  | 98.25  | 30,823 | 53,326 |
| 61 | Contig8437  | 66.8 | PAR    | QBIE01009445.1        | 35,060  | 99.18  | 7,448  | 9,405  |
| 62 | Contig1800  | 66.8 | PAR    | QBIE01020164.1        | 9,313   | 99.43  | 1,594  | 1,767  |
| 63 | Contig1431  | 66.8 | PAR    | NA                    |         |        |        |        |
| 64 | Contig1089  | 66.8 | PAR    | <b>QBIE01001489.1</b> | 60,031  | 100.00 | 27,618 | 31,565 |
| 65 | Contig7074  | 66.9 | PAR    | NA                    |         |        |        |        |
| 66 | Contig1252  | 66.9 | PAR    | QBIE01017794.1        | 11,043  | 97.73  | 1,799  | 2,371  |
| 67 | Contig8534  | 66.9 | PAR    | QBIE01005133.1        | 33,928  | 98.21  | 590    | 4,216  |
| 68 | Contig889   | 66.9 | PAR    | QBIE01004434.1        | 100,419 | 98.32  | 64,649 | 93,792 |
| 69 | Contig1714  | 66.9 | PAR    | QBIE01004836.1        | 36,703  | 98.53  | 5,017  | 8,447  |
| 70 | Contig1093  | 67   | PAR    | NA                    |         |        |        |        |
| 71 | Contig924   | 67   | PAR    | QBIE01135924.1        | 5,496   | 99.17  | 2,577  | 5,496  |
| 72 | Contig1960  | 67.4 | PAR    | <b>QBIE01001489.1</b> | 60,031  | 99.29  | 44,209 | 58,775 |
| 73 | Contig17553 | 67.4 | PAR    | QBIE01000761.1        | 71,010  | 100.00 | 41,525 | 44,171 |
| 74 | Contig16348 | 67.4 | PAR    | QBIE01037568.1        | 5,387   | 99.34  | 5,086  | 5,387  |
| 75 | Contig2235  | 67.4 | PAR    | NA                    |         |        |        |        |
| 76 | Contig682   | 70.2 | PAR    | <b>QBIE01000100.1</b> | 121,065 | 99.24  | 57,082 | 59,379 |

|    |             |      |     |                       |         |        |        |        |
|----|-------------|------|-----|-----------------------|---------|--------|--------|--------|
| 77 | Contig4687  | 70.2 | PAR | NA                    |         |        |        |        |
| 78 | Contig8471  | 70.2 | PAR | QBIE01077958.1        | 3,659   | 100.00 | 63     | 2,859  |
| 79 | Contig3881  | 70.2 | PAR | NA                    |         |        |        |        |
| 80 | Contig1751  | 70.2 | PAR | <b>QBIE01000100.1</b> | 121,065 | 99.13  | 26,804 | 34,132 |
| 81 | Contig2223  | 71.5 | PAR | <b>QBIE01000100.1</b> | 121,065 | 98.77  | 7,817  | 12,956 |
| 82 | Contig947   | 71.7 | PAR | QBIE01167309.1        | 1,197   | 99.37  | 1,040  | 1,197  |
| 83 | Contig8300  | 71.9 | PAR | QBIE01002687.1        | 45,138  | 98.23  | 13,382 | 19,328 |
| 84 | Contig15701 | 72   | PAR | QBIE01003402.1        | 62,544  | 100.00 | 37,034 | 39,788 |
| 85 | Contig991   | 72   | PAR | <b>QBIE01000100.1</b> | 121,065 | 98.67  | 50,890 | 51,039 |
| 86 | Contig3920  | 72.1 | PAR | QBIE01006256.1        | 34,860  | 100.00 | 13,134 | 13,240 |

---
